# Supplementary material for: MicroRNA-146a Deficiency Protects against Listeria monocytogenes Infection by Modulating the Gut Microbiota
Source: PubMed Central journal article supplement (PMC5979314; doi:10.3390/ijms19040993), 2018-03-26
Supplement: ijms-19-00993-s001.pdf [file ijms-19-00993-s001.pdf]

1 **Supplementary Materials**

2 **Table S1. Analysis of 16S rRNA gene sequences.**

| Sample Name   | No.reads | Observed<br>-species | Shannon | Simpson | Chao1   | ACE     | Good's<br>coverage |
|---------------|----------|----------------------|---------|---------|---------|---------|--------------------|
| WT 1          | 59,243   | 353                  | 5.933   | 0.961   | 419.300 | 387.581 | 0.998              |
| WT 2          | 50,362   | 355                  | 6.218   | 0.972   | 366.447 | 372.208 | 0.999              |
| WT 3          | 59,288   | 362                  | 5.860   | 0.957   | 417.000 | 403.746 | 0.998              |
| WT 4          | 67,117   | 360                  | 5.905   | 0.964   | 465.286 | 412.770 | 0.998              |
| WT 5          | 62,160   | 352                  | 5.917   | 0.964   | 422.714 | 394.597 | 0.998              |
| WT 6          | 48,838   | 353                  | 6.137   | 0.967   | 373.517 | 375.591 | 0.999              |
| WT 7          | 63,900   | 370                  | 5.969   | 0.959   | 403.176 | 403.059 | 0.999              |
| WT 8          | 61,243   | 362                  | 6.189   | 0.969   | 397.037 | 392.522 | 0.999              |
| miR146a KO 1  | 55,575   | 383                  | 6.093   | 0.961   | 414.364 | 409.697 | 0.999              |
| miR-146a KO 2 | 52,511   | 394                  | 6.248   | 0.964   | 404.568 | 408.526 | 0.999              |
| miR-146a KO 3 | 63,629   | 412                  | 6.147   | 0.965   | 455.872 | 448.665 | 0.998              |
| miR-146a KO 4 | 64,696   | 392                  | 6.386   | 0.97    | 420.447 | 420.744 | 0.999              |
| miR-146a KO 5 | 67,937   | 410                  | 6.552   | 0.975   | 455.370 | 440.006 | 0.999              |
| miR-146a KO 6 | 60,355   | 405                  | 6.356   | 0.971   | 433.286 | 429.992 | 0.999              |
| miR-146a KO 7 | 50,537   | 374                  | 6.055   | 0.965   | 398.118 | 398.281 | 0.999              |
| miR-146a KO 8 | 56,328   | 370                  | 5.819   | 0.953   | 416.406 | 406.935 | 0.998              |

3 Number of sequences, observed-species, Shannon index, simpson index, Chao1 index, ACE index and Good's coverage  
4 calculated for the microbial communities of lamb packaged in the VP and MAP environments for each storage period for  
5 high-throughput sequence reads determined at a 97% similarity.

6

7 **Table S2. Sequences of 16S rRNA V4 primer.**

| 16S rRNA V4 primers | Sequence (5' to 3')   |
|---------------------|-----------------------|
| 515F                | GTGCCAGCMGCCGCGGTAA   |
| 806R                | GGACTACH-VGGGTWTCTAAT |

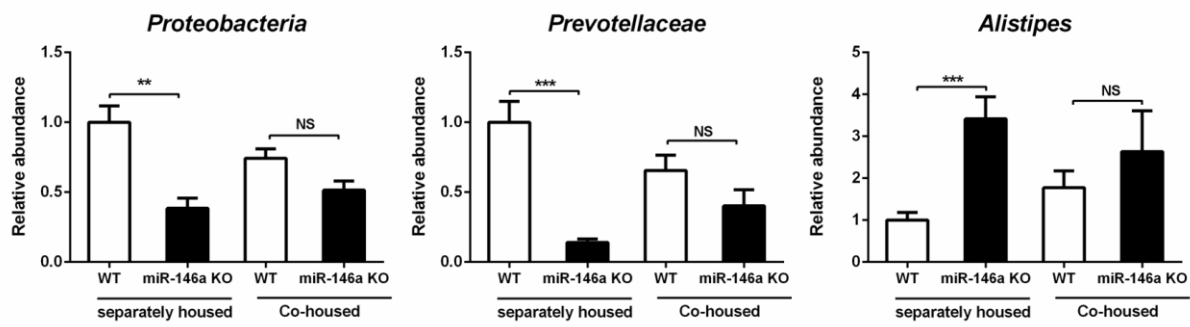

8

9 **Figure S1. Relative abundance of bacterial populations in separately housed and co-housed mice.** The  
 10 results are means  $\pm$  SEM of 8 mice/group; significance of differences: \*P < 0.05; \*\*P < 0.01; \*\*\*P < 0.001; NS, no  
 11 significance.

12

13

14
